# Supplementary material
Source: PubMed Central journal article supplement (PMC4907268)

**An atlas of the human kinome reveals the mutational  
landscape underlying dysregulated phosphorylation  
cascades in cancer**

Aleksandra Olow\*, Zhongzhong Chen\*, R. Hannes Niedner, Denise M.  
Wolf, Christina Yau, Aleksandr Pankov, Evelyn Pei Rong Lee, Lamorna  
Brown-Swigart, Laura J. van 't Veer, and Jean-Philippe Coppé

**SUPPLEMENTARY FIGURES  
S1 to S17**

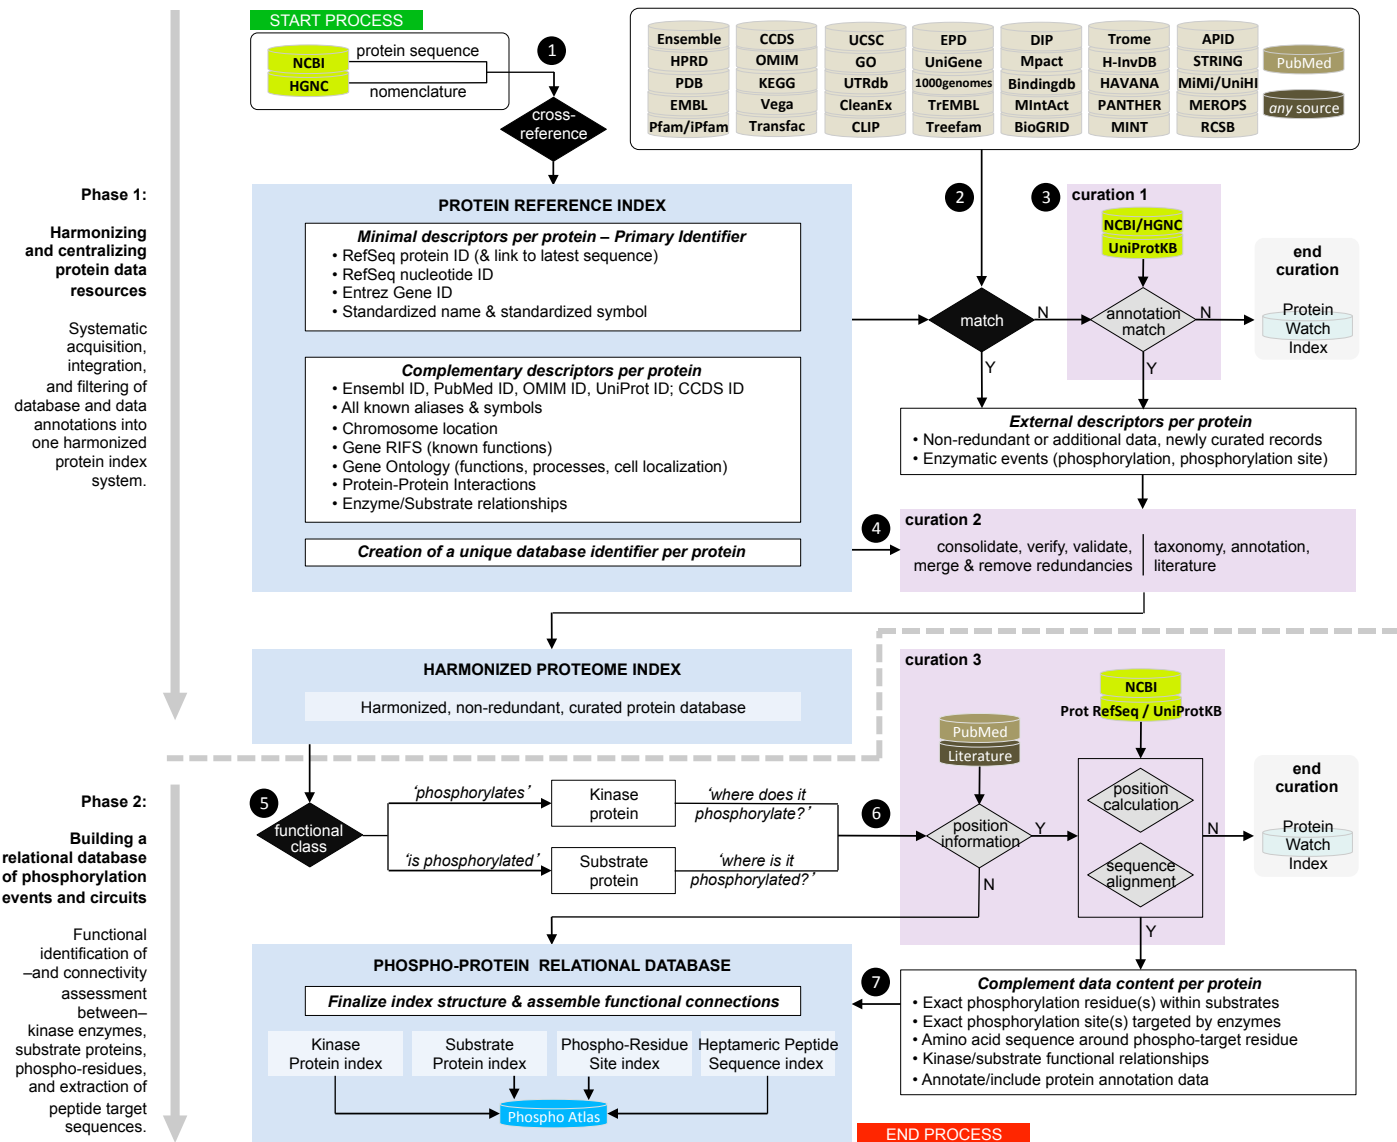

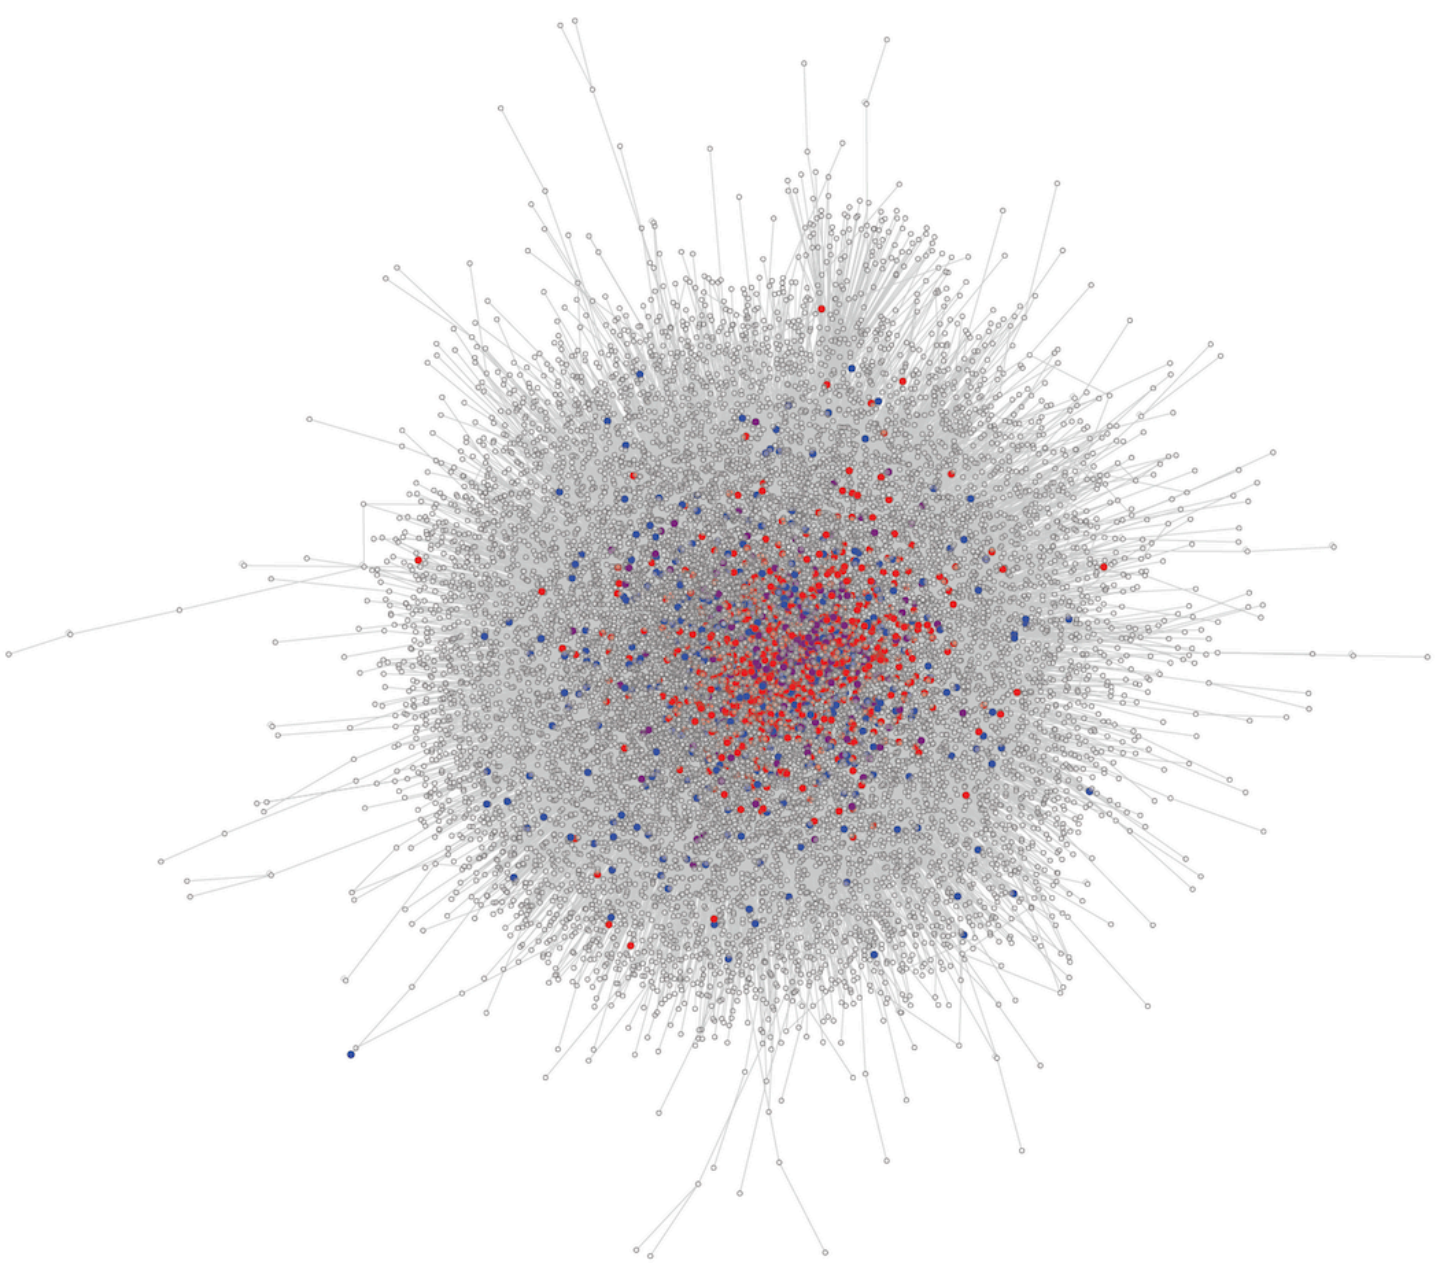

**Supplement Figure S2**

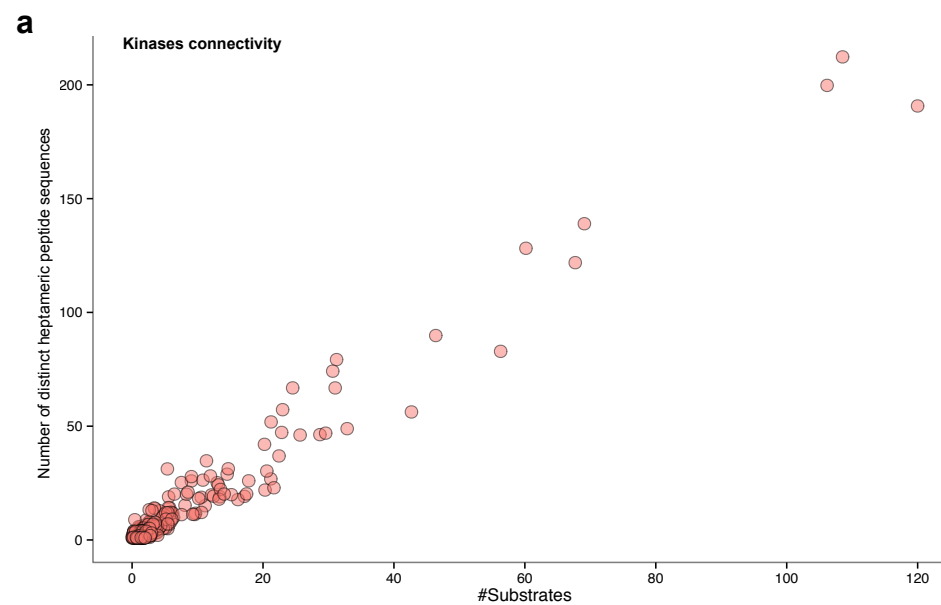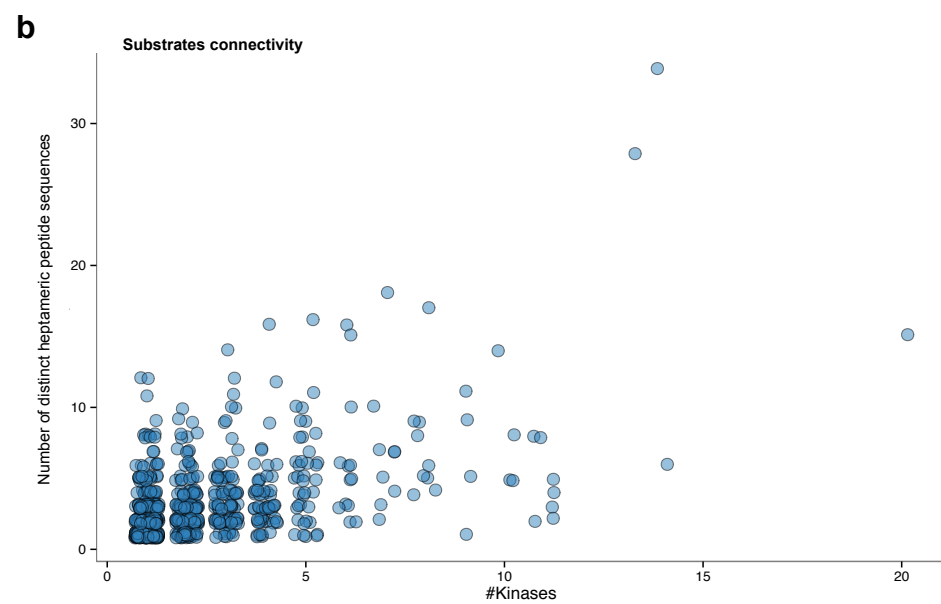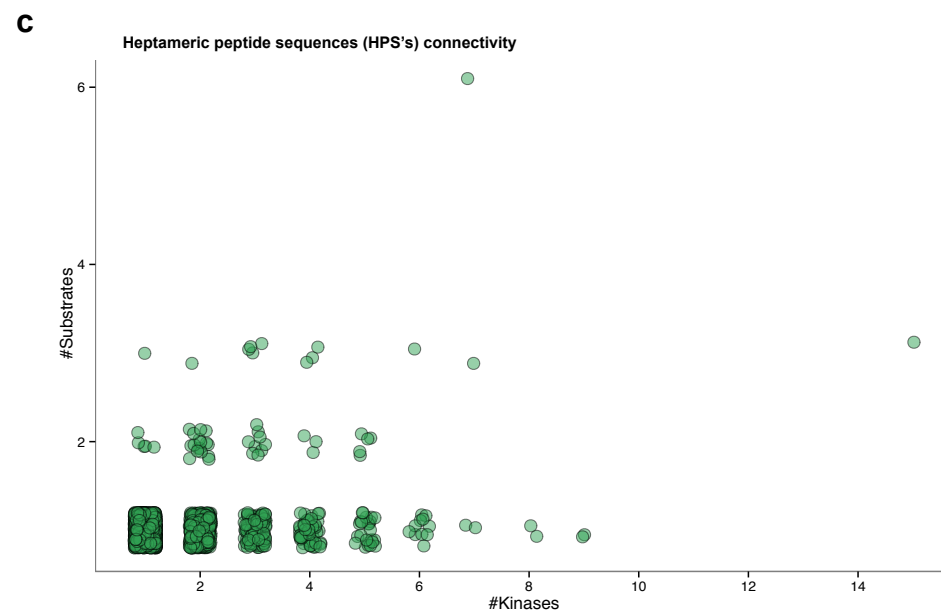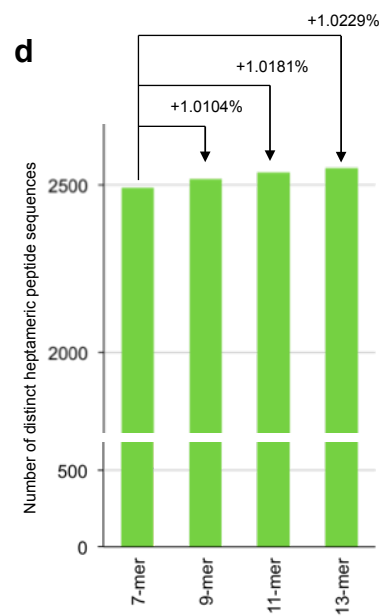

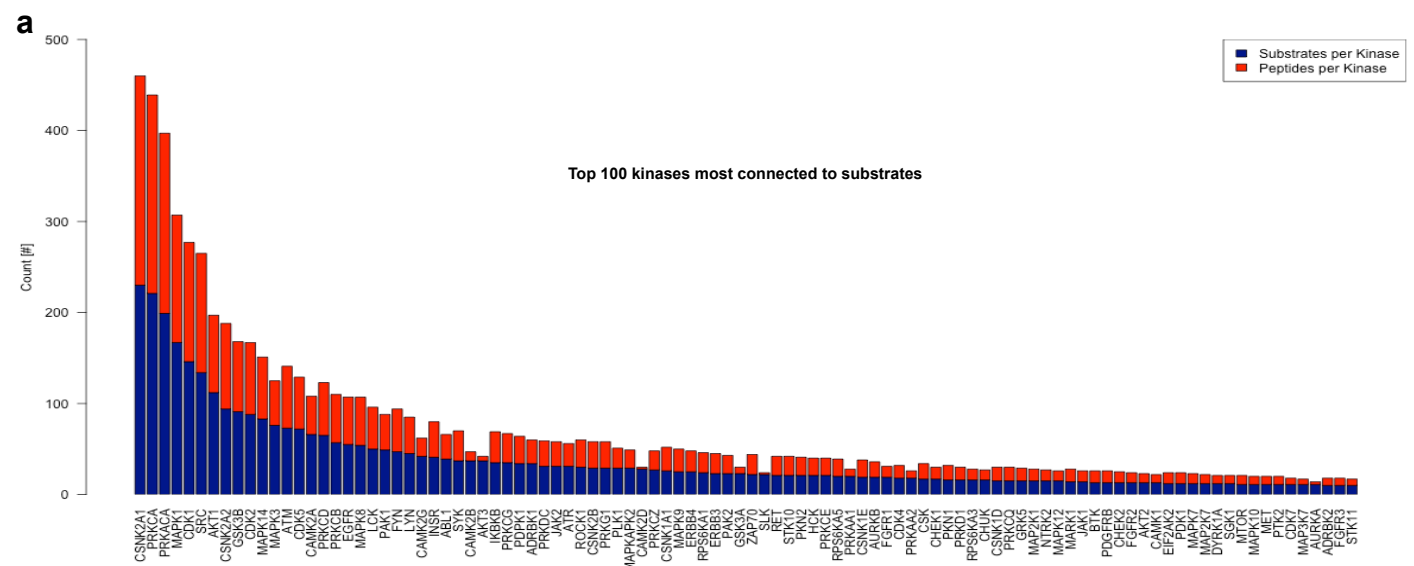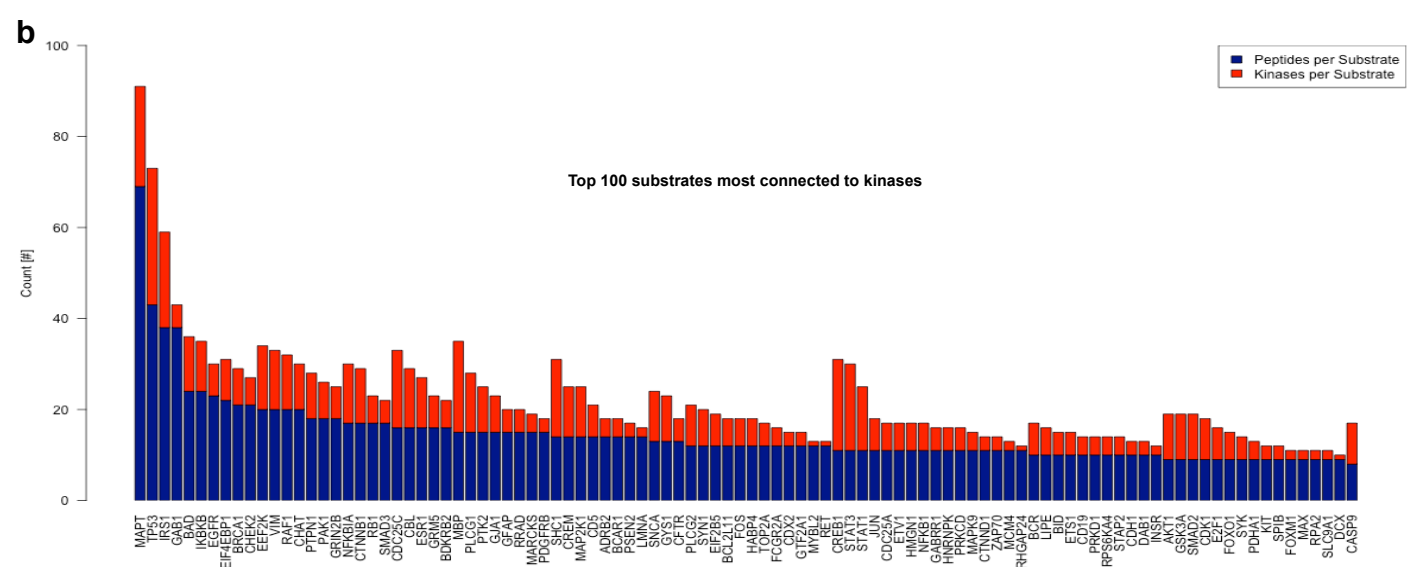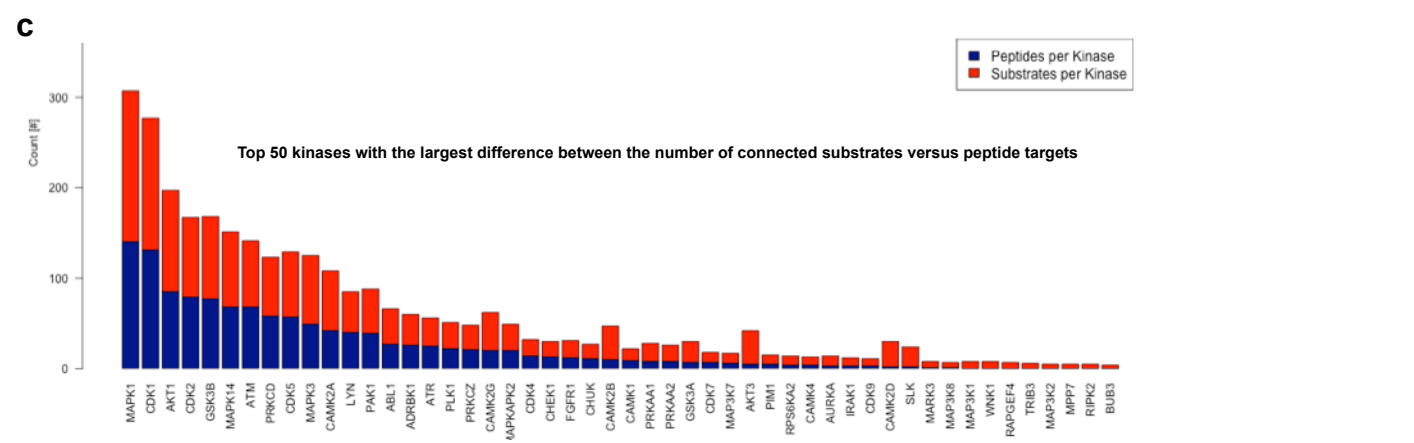

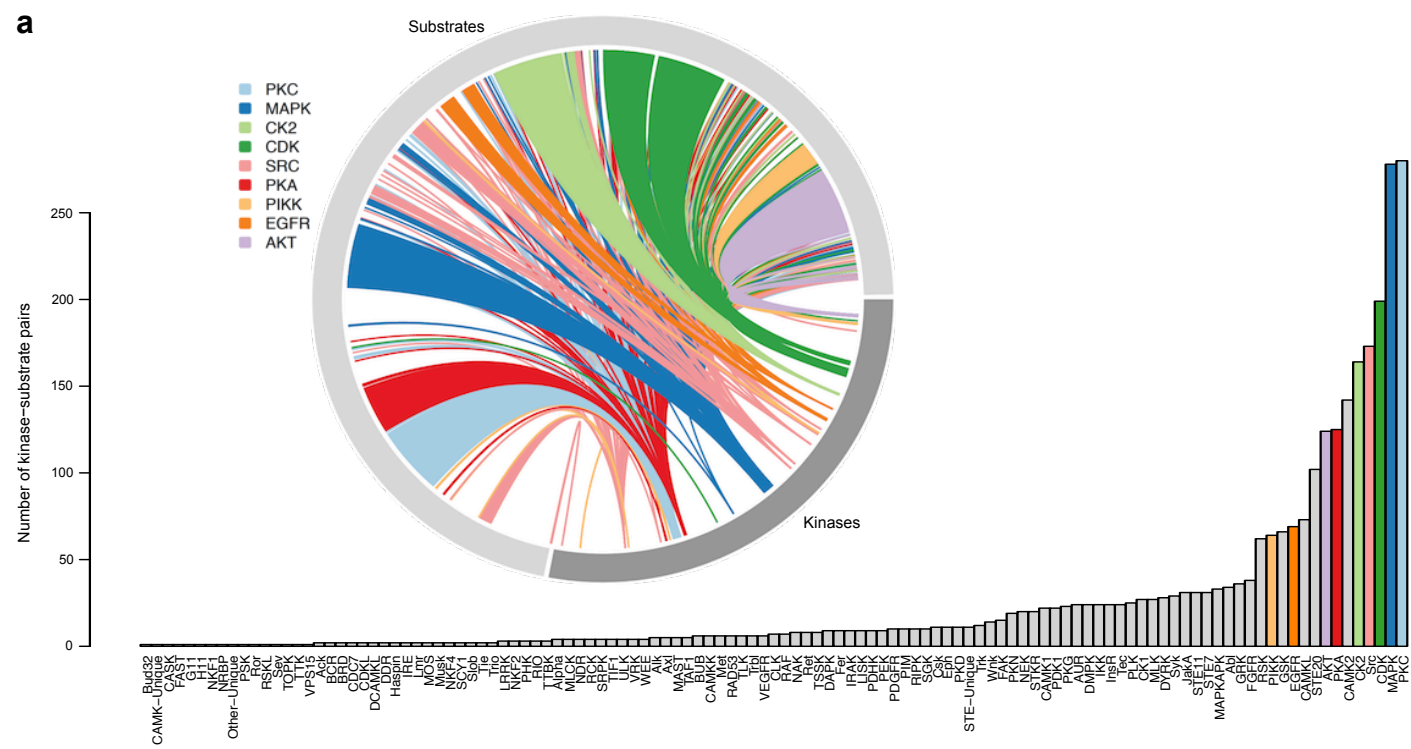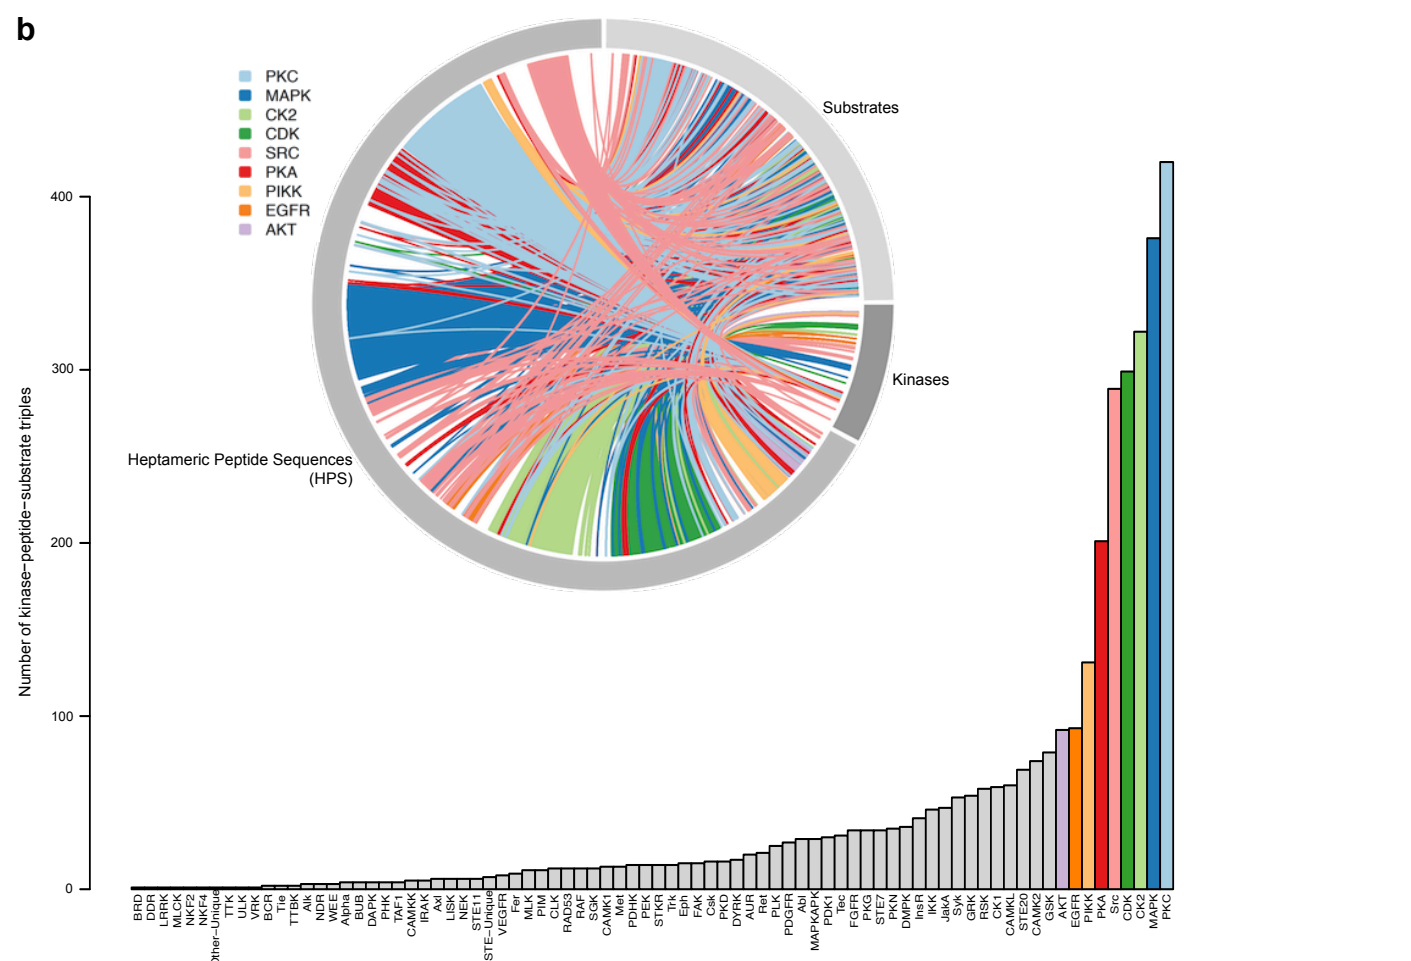

Supplement Figure S5

**a**

| Disease category (Disease Ontology-terms were classified under 13 categories) | # of different DO terms per category | # of associated proteins per category | ontology details                                                                                                  |
|-------------------------------------------------------------------------------|--------------------------------------|---------------------------------------|-------------------------------------------------------------------------------------------------------------------|
| Cancer                                                                        | 63                                   | 40                                    | including malignant cancers, neoplasms, or hamartomas, across all tissue or cell types                            |
| Development anomalies                                                         | 26                                   | 18                                    | including congenital disorders, multisystem diseases, growth defects, mental retardation, intellectual disability |
| Cardio-vascular disorder conditions                                           | 23                                   | 14                                    | including atherosclerosis, coronary artery disease, hypertension, cardiopathies                                   |
| Neuropathies                                                                  | 18                                   | 14                                    | including neurodegenerative disorders                                                                             |
| Metabolic dysfunctions                                                        | 11                                   | 9                                     | including diabetes, obesity, insulin and glycoemic dysregulation                                                  |
| Immune deficiencies                                                           | 12                                   | 10                                    | including auto-immune disorders                                                                                   |
| Infections                                                                    | 9                                    | 8                                     | both viral & bacterial                                                                                            |
| Hematologic diseases                                                          | 13                                   | 7                                     | including anemic and bleeding disorders                                                                           |
| Myelopathies                                                                  | 8                                    | 5                                     | including bone marrow disorders                                                                                   |
| Myopathies                                                                    | 7                                    | 5                                     | including muscular degenerative diseases                                                                          |
| Mental or psychiatric affections                                              | 6                                    | 4                                     | -                                                                                                                 |
| Osteopathies                                                                  | 4                                    | 4                                     | -                                                                                                                 |
| Other                                                                         | 23                                   | 13                                    | including disorders of eye, kidney, lung, skin, thyroid, digestive and reproductive system                        |

**b**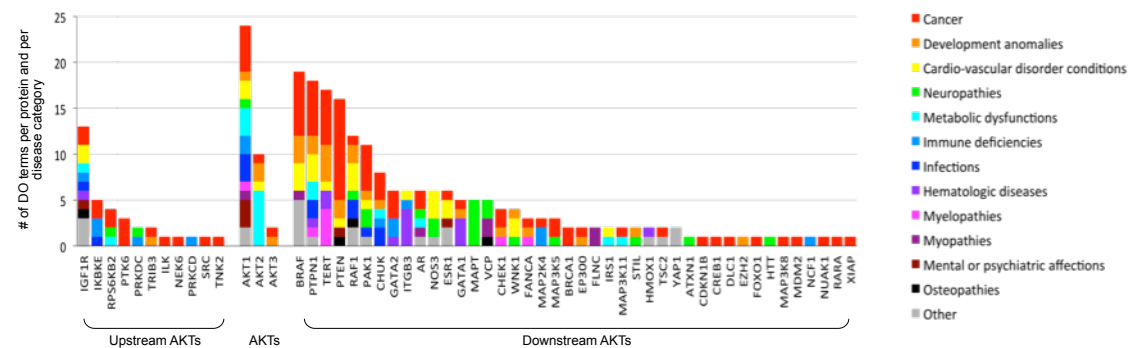

### AKTs as substrate

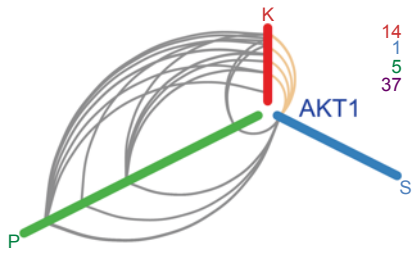

### AKTs as kinase

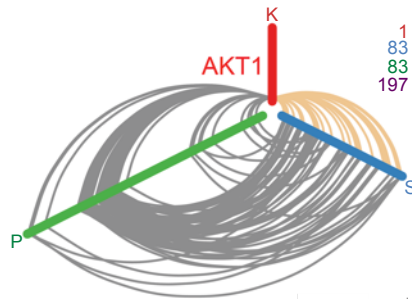

### AKT-centric

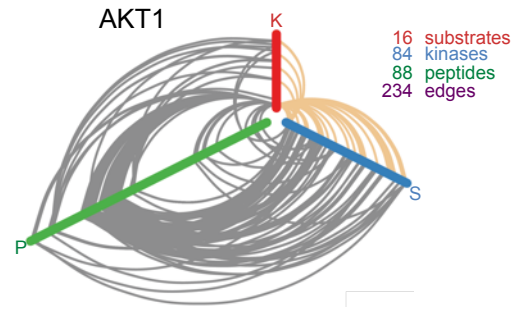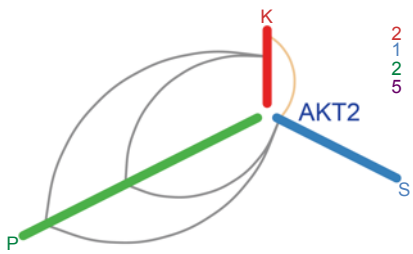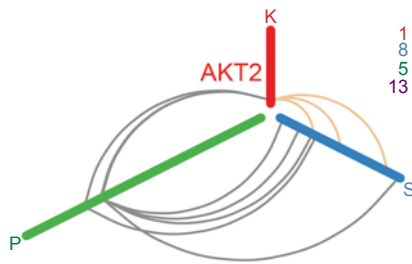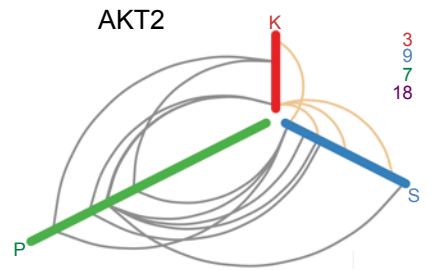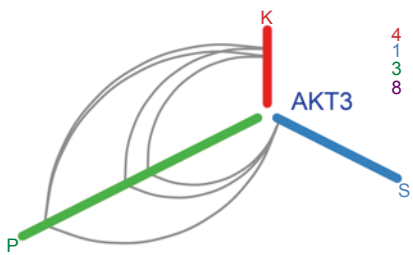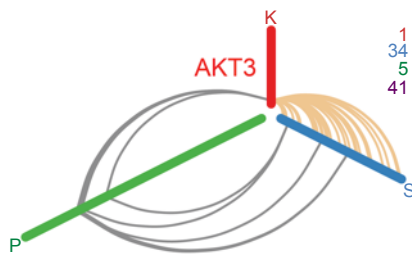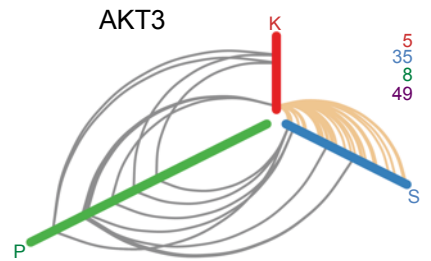

— Edges connecting a kinase to a substrate via a peptide target sequence

— Edges connecting kinase to substrates without a known/verified residue target site

} total # of edges





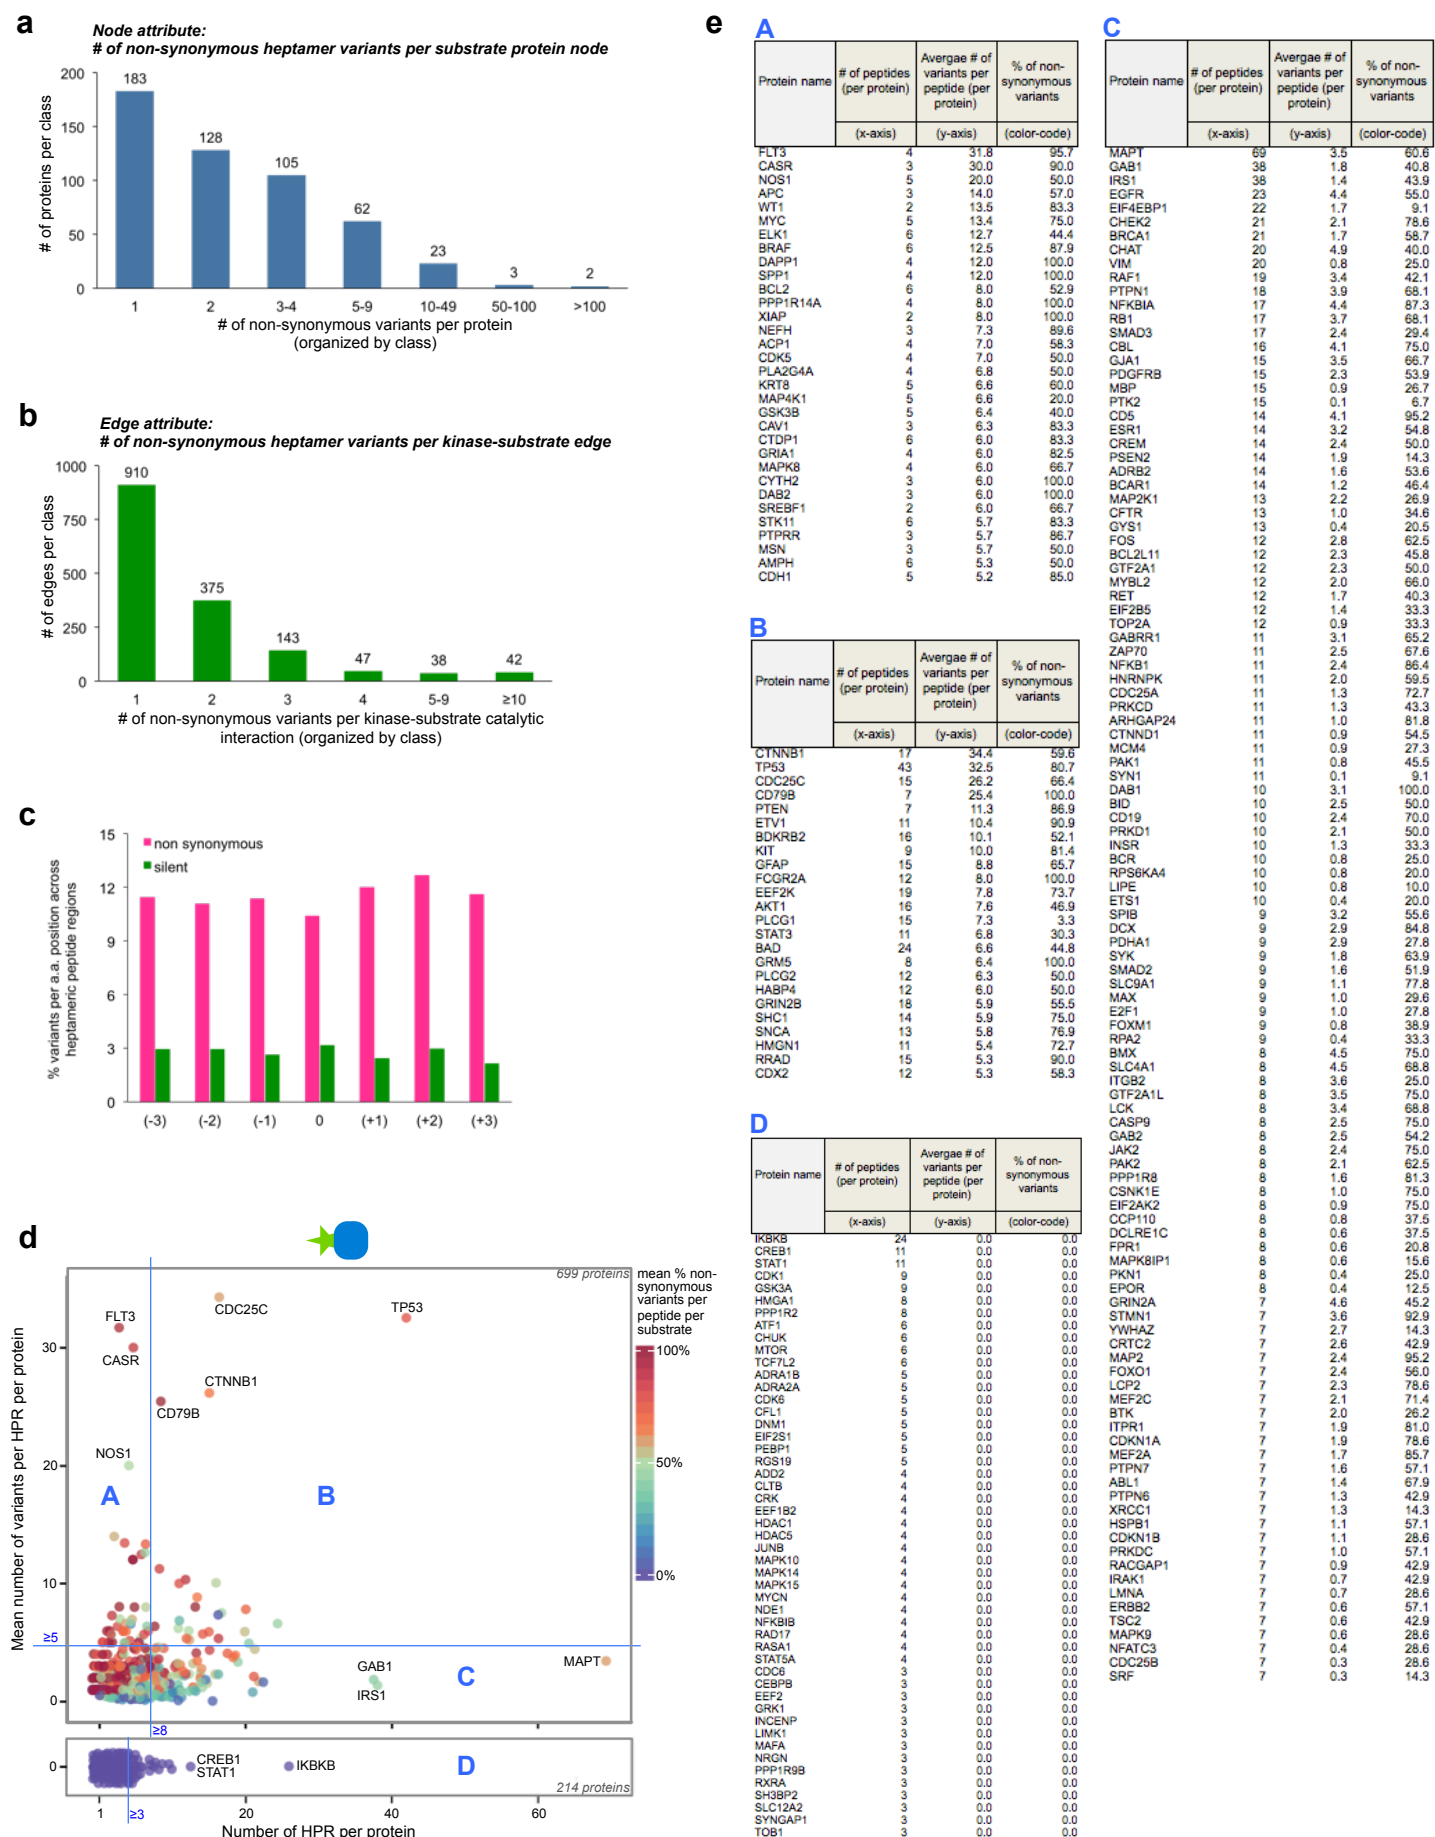

Supplement Figure S9

**a**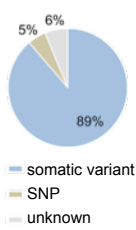**b**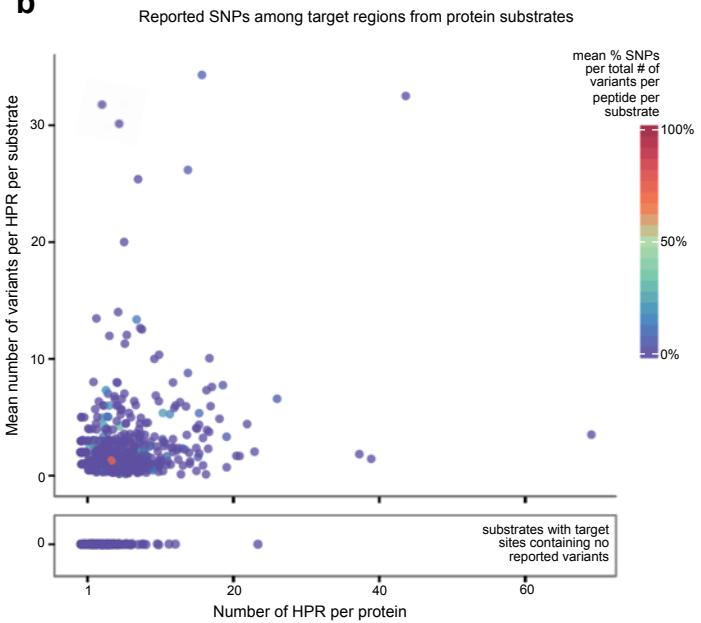**c**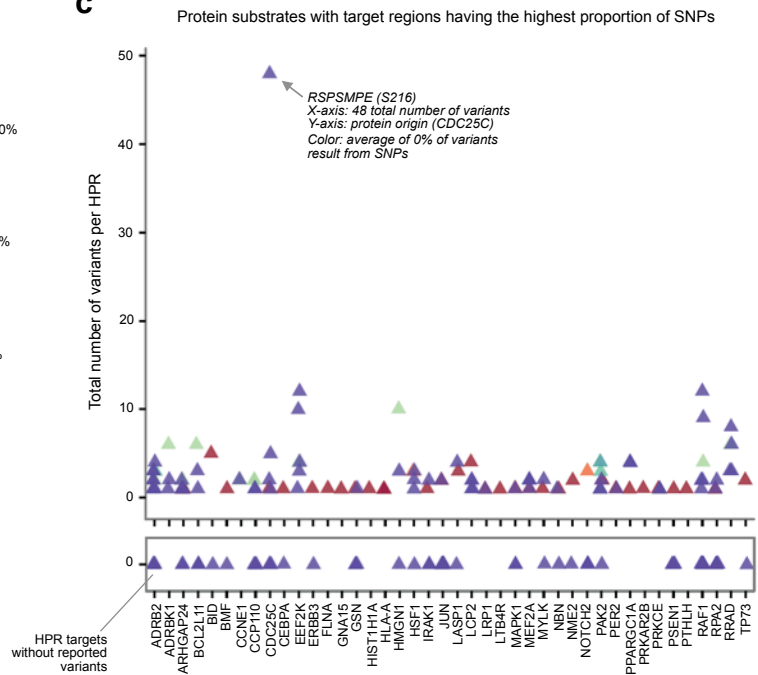**d**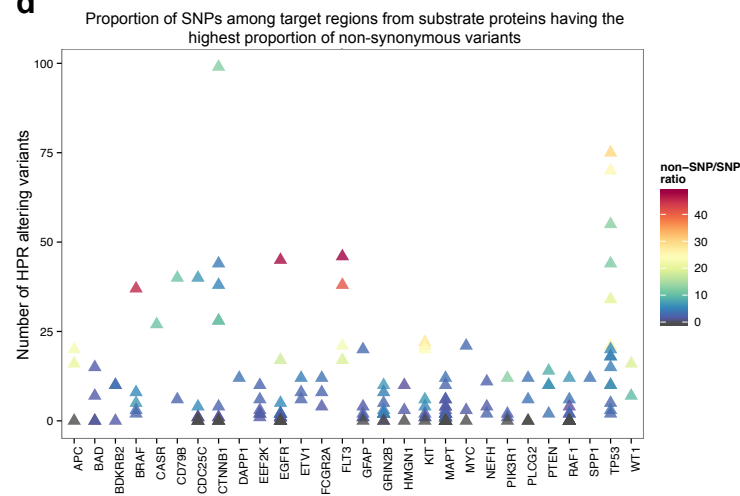

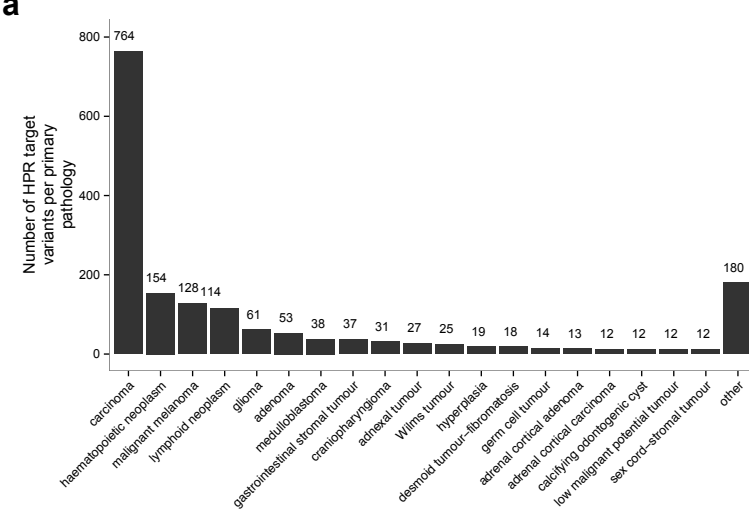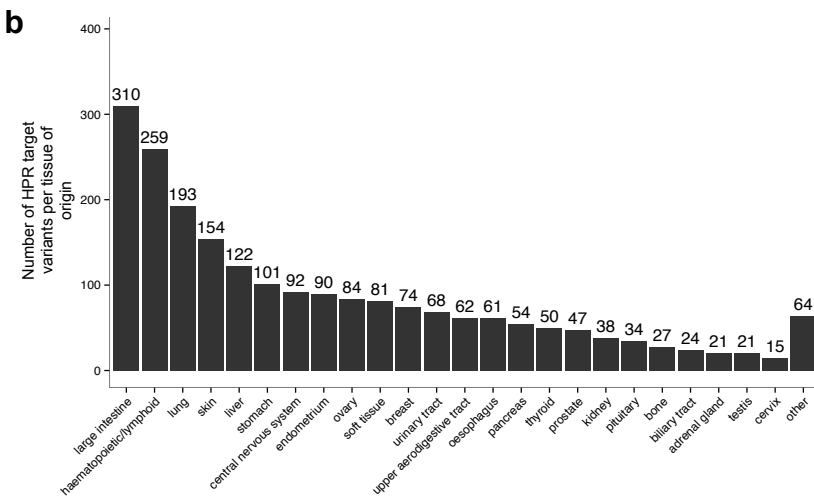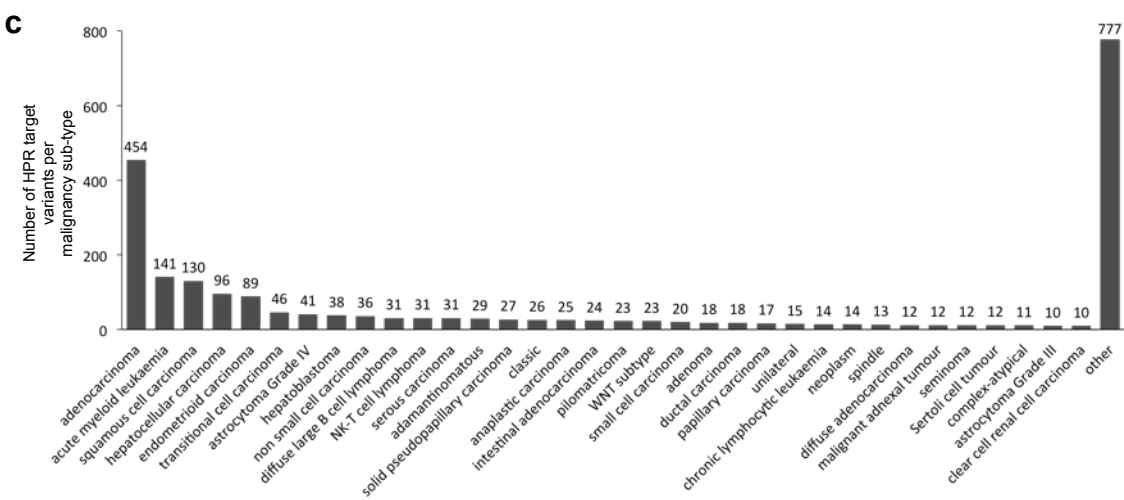

**a**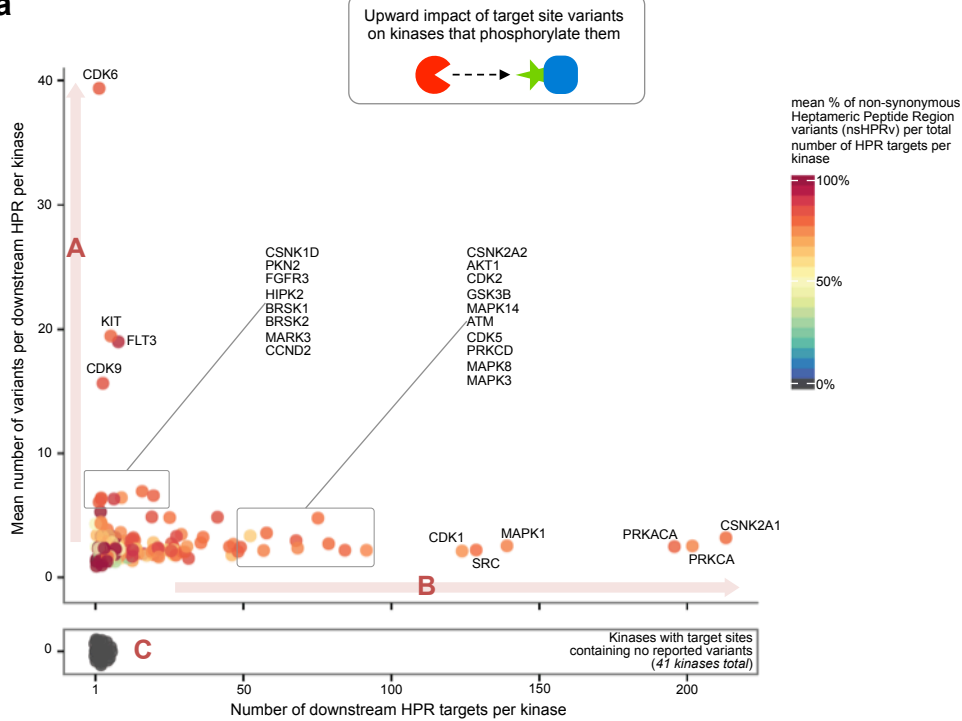**b**

Kinases with the highest average of non-synonymous HPR variants per targeted HPR

| Kinase name | # of distinct heptameric peptide regions phosphorylated by the listed kinase | mean # of variants per HPR target per kinase | mean % non-synonymous variants per HPR target per kinase (% nsHPRv) |
|-------------|------------------------------------------------------------------------------|----------------------------------------------|---------------------------------------------------------------------|
| CHUK        | 11                                                                           | 1.7                                          | 100.0                                                               |
| TEC         | 7                                                                            | 2.0                                          | 100.0                                                               |
| GSK3A       | 7                                                                            | 1.8                                          | 100.0                                                               |
| GRK1        | 6                                                                            | 3.0                                          | 100.0                                                               |
| MAP3K7      | 6                                                                            | 2.8                                          | 100.0                                                               |
| PTK6        | 6                                                                            | 1.5                                          | 100.0                                                               |
| BUB1        | 6                                                                            | 1.0                                          | 100.0                                                               |
| PAK3        | 5                                                                            | 2.3                                          | 100.0                                                               |
| MAP3K5      | 5                                                                            | 1.8                                          | 100.0                                                               |
| BMPRI1B     | 5                                                                            | 1.0                                          | 100.0                                                               |
| ERBB2       | 5                                                                            | 1.0                                          | 100.0                                                               |
| OXSRI       | 4                                                                            | 3.0                                          | 100.0                                                               |
| BLK         | 4                                                                            | 2.0                                          | 100.0                                                               |
| RPS6KA2     | 4                                                                            | 1.5                                          | 100.0                                                               |
| TAF1        | 4                                                                            | 1.5                                          | 100.0                                                               |
| FER         | 4                                                                            | 1.3                                          | 100.0                                                               |
| STK4        | 4                                                                            | 1.3                                          | 100.0                                                               |
| ABL2        | 4                                                                            | 1.0                                          | 100.0                                                               |
| MAPKAPK3    | 4                                                                            | 1.0                                          | 100.0                                                               |
| CAMKK1      | 3                                                                            | 2.0                                          | 100.0                                                               |
| RPS6KA4     | 3                                                                            | 2.0                                          | 100.0                                                               |
| SIK1        | 3                                                                            | 2.0                                          | 100.0                                                               |
| SIK3        | 3                                                                            | 2.0                                          | 100.0                                                               |
| FGR         | 3                                                                            | 1.5                                          | 100.0                                                               |
| AURKA       | 3                                                                            | 1.0                                          | 100.0                                                               |
| AXL         | 3                                                                            | 1.0                                          | 100.0                                                               |
| CLK2        | 3                                                                            | 1.0                                          | 100.0                                                               |
| FGFR4       | 3                                                                            | 1.0                                          | 100.0                                                               |
| IRAK1       | 3                                                                            | 1.0                                          | 100.0                                                               |
| PRKAR1A     | 3                                                                            | 1.0                                          | 100.0                                                               |
| TYK2        | 3                                                                            | 1.0                                          | 100.0                                                               |
| EPHB1       | 2                                                                            | 2.0                                          | 100.0                                                               |
| PKM         | 2                                                                            | 2.0                                          | 100.0                                                               |
| RPS6KB1     | 2                                                                            | 2.0                                          | 100.0                                                               |
| SIK2        | 2                                                                            | 2.0                                          | 100.0                                                               |
| TGFBR1      | 2                                                                            | 2.0                                          | 100.0                                                               |
| WEE1        | 2                                                                            | 2.0                                          | 100.0                                                               |
| DAPK1       | 2                                                                            | 1.5                                          | 100.0                                                               |
| DYRK1B      | 2                                                                            | 1.5                                          | 100.0                                                               |
| BCR         | 2                                                                            | 1.0                                          | 100.0                                                               |
| CAMK2D      | 2                                                                            | 1.0                                          | 100.0                                                               |
| CDK3        | 2                                                                            | 1.0                                          | 100.0                                                               |
| EPHB2       | 2                                                                            | 1.0                                          | 100.0                                                               |
| FRK         | 2                                                                            | 1.0                                          | 100.0                                                               |
| IRAK4       | 2                                                                            | 1.0                                          | 100.0                                                               |
| MAP2K3      | 2                                                                            | 1.0                                          | 100.0                                                               |
| NME1-NME2   | 2                                                                            | 1.0                                          | 100.0                                                               |
| NME2        | 2                                                                            | 1.0                                          | 100.0                                                               |
| RAD17       | 2                                                                            | 1.0                                          | 100.0                                                               |
| CAND2       | 1                                                                            | 5.0                                          | 100.0                                                               |
| NEK8        | 1                                                                            | 3.0                                          | 100.0                                                               |
| ACVR1B      | 1                                                                            | 2.0                                          | 100.0                                                               |
| CSF1R       | 1                                                                            | 2.0                                          | 100.0                                                               |
| MAP4K1      | 1                                                                            | 2.0                                          | 100.0                                                               |
| MATK        | 1                                                                            | 2.0                                          | 100.0                                                               |
| NUAK1       | 1                                                                            | 2.0                                          | 100.0                                                               |
| PKD1        | 1                                                                            | 2.0                                          | 100.0                                                               |
| PTPN11      | 1                                                                            | 2.0                                          | 100.0                                                               |
| STK3        | 1                                                                            | 2.0                                          | 100.0                                                               |
| BCAT2       | 1                                                                            | 1.0                                          | 100.0                                                               |
| CCNE1       | 1                                                                            | 1.0                                          | 100.0                                                               |
| CSNK1G1     | 1                                                                            | 1.0                                          | 100.0                                                               |
| DAPK3       | 1                                                                            | 1.0                                          | 100.0                                                               |
| DMPK        | 1                                                                            | 1.0                                          | 100.0                                                               |
| HIPK3       | 1                                                                            | 1.0                                          | 100.0                                                               |
| NEK2        | 1                                                                            | 1.0                                          | 100.0                                                               |
| PRKCI       | 1                                                                            | 1.0                                          | 100.0                                                               |
| PRKY        | 1                                                                            | 1.0                                          | 100.0                                                               |
| TAOK1       | 1                                                                            | 1.0                                          | 100.0                                                               |
| TTK         | 1                                                                            | 1.0                                          | 100.0                                                               |
| TTN         | 1                                                                            | 1.0                                          | 100.0                                                               |
| ZRANB2      | 1                                                                            | 1.0                                          | 100.0                                                               |

**c**

**A** Kinases with the highest average # of variants per targeted HPR (y-axis extremes)

| Kinase name | # of distinct heptameric peptide regions phosphorylated by the listed kinase | mean # of variants per HPR target per kinase | mean % non-synonymous variants per HPR target per kinase (% nsHPRv) |
|-------------|------------------------------------------------------------------------------|----------------------------------------------|---------------------------------------------------------------------|
|             | (x-axis)                                                                     | (y-axis)                                     | (color-code)                                                        |
| CDK6        | 1                                                                            | 39.0                                         | 84.6                                                                |
| KIT         | 5                                                                            | 19.0                                         | 82.5                                                                |
| FLT3        | 7                                                                            | 18.7                                         | 95.4                                                                |
| CDK9        | 3                                                                            | 15.3                                         | 87.0                                                                |
| CSNK1D      | 15                                                                           | 6.6                                          | 81.1                                                                |
| PKN2        | 19                                                                           | 6.3                                          | 84.1                                                                |
| FGFR3       | 8                                                                            | 6.0                                          | 75.0                                                                |
| HIPK2       | 5                                                                            | 6.0                                          | 91.7                                                                |
| BRSK1       | 2                                                                            | 6.0                                          | 83.3                                                                |
| BRSK2       | 2                                                                            | 6.0                                          | 83.3                                                                |
| MARK3       | 1                                                                            | 6.0                                          | 83.3                                                                |
| CCND2       | 1                                                                            | 5.0                                          | 100.0                                                               |
| CSNK1E      | 19                                                                           | 4.5                                          | 87.0                                                                |
| CAMK2A      | 42                                                                           | 4.5                                          | 87.2                                                                |
| GSK3B       | 75                                                                           | 4.5                                          | 79.4                                                                |
| CSNK1A1     | 25                                                                           | 4.4                                          | 79.0                                                                |
| PLK3        | 3                                                                            | 4.0                                          | 75.0                                                                |
| FCGR3A      | 1                                                                            | 4.0                                          | 75.0                                                                |
| TAOK2       | 1                                                                            | 4.0                                          | 50.0                                                                |
| VRK1        | 1                                                                            | 4.0                                          | 75.0                                                                |
| KDR         | 4                                                                            | 3.5                                          | 78.6                                                                |
| SGK1        | 9                                                                            | 3.2                                          | 75.0                                                                |
| CDK5        | 57                                                                           | 3.2                                          | 81.0                                                                |
| CSNK2B      | 29                                                                           | 3.2                                          | 75.9                                                                |
| GRK1        | 6                                                                            | 3.0                                          | 100.0                                                               |
| AKT3        | 5                                                                            | 3.0                                          | 66.7                                                                |
| OXSRI       | 4                                                                            | 3.0                                          | 100.0                                                               |
| PHKA1       | 4                                                                            | 3.0                                          | 66.7                                                                |
| EPHB4       | 3                                                                            | 3.0                                          | 66.7                                                                |
| STK38       | 3                                                                            | 3.0                                          | 66.7                                                                |
| NEK8        | 1                                                                            | 3.0                                          | 100.0                                                               |
| SHC1        | 1                                                                            | 3.0                                          | 66.7                                                                |

**B** Kinases with the highest # of targeted HPRs (x-axis extremes)

| Kinase name | # of distinct heptameric peptide regions phosphorylated by the listed kinase | mean # of variants per HPR target per kinase | mean % non-synonymous variants per HPR target per kinase (% nsHPRv) |
|-------------|------------------------------------------------------------------------------|----------------------------------------------|---------------------------------------------------------------------|
|             | (x-axis)                                                                     | (y-axis)                                     | (color-code)                                                        |
| CSNK2A1     | 213                                                                          | 2.8                                          | 81.3                                                                |
| PRKCA       | 201                                                                          | 2.2                                          | 76.6                                                                |
| PRKACA      | 195                                                                          | 2.1                                          | 83.1                                                                |
| MAPK1       | 140                                                                          | 2.1                                          | 76.9                                                                |
| SRC         | 128                                                                          | 1.9                                          | 80.3                                                                |
| CDK1        | 124                                                                          | 1.7                                          | 74.8                                                                |
| CSNK2A2     | 91                                                                           | 1.9                                          | 75.7                                                                |
| AKT1        | 85                                                                           | 1.8                                          | 82.1                                                                |
| CDK2        | 79                                                                           | 2.4                                          | 80.8                                                                |
| GSK3B       | 75                                                                           | 4.5                                          | 79.4                                                                |
| MAPK14      | 68                                                                           | 1.9                                          | 76.3                                                                |
| ATM         | 67                                                                           | 2.6                                          | 84.8                                                                |
| CDK5        | 57                                                                           | 3.2                                          | 81.0                                                                |
| PRKCD       | 56                                                                           | 1.8                                          | 77.1                                                                |
| MAPK8       | 53                                                                           | 2.9                                          | 63.4                                                                |
| MAPK3       | 49                                                                           | 2.0                                          | 83.8                                                                |
| PRKCB       | 48                                                                           | 1.8                                          | 83.1                                                                |
| FYN         | 47                                                                           | 2.3                                          | 76.1                                                                |
| EGFR        | 47                                                                           | 1.4                                          | 67.6                                                                |
| LCK         | 46                                                                           | 2.1                                          | 81.3                                                                |
| CAMK2A      | 42                                                                           | 4.5                                          | 87.2                                                                |
| LYN         | 37                                                                           | 2.6                                          | 79.7                                                                |
| INSR        | 35                                                                           | 2.5                                          | 79.6                                                                |
| SYK         | 31                                                                           | 1.9                                          | 73.8                                                                |
| IKKBK       | 31                                                                           | 1.2                                          | 87.5                                                                |
| ROCK1       | 30                                                                           | 1.7                                          | 83.9                                                                |
| PRKCG       | 30                                                                           | 1.7                                          | 79.5                                                                |
| CSNK2B      | 29                                                                           | 3.2                                          | 75.9                                                                |
| PRKDC       | 28                                                                           | 2.9                                          | 88.0                                                                |
| PDPK1       | 28                                                                           | 1.3                                          | 80.0                                                                |
| ABL1        | 27                                                                           | 1.5                                          | 61.9                                                                |
| ADRBK1      | 26                                                                           | 2.1                                          | 82.6                                                                |
| JAK2        | 26                                                                           | 1.9                                          | 63.0                                                                |
| PRKG1       | 26                                                                           | 1.8                                          | 85.7                                                                |
| CSNK1A1     | 25                                                                           | 4.4                                          | 79.0                                                                |
| ATR         | 25                                                                           | 2.4                                          | 85.4                                                                |
| MAPK9       | 25                                                                           | 1.8                                          | 71.4                                                                |
| ERBB4       | 23                                                                           | 1.8                                          | 60.0                                                                |
| ERBB3       | 22                                                                           | 2.0                                          | 66.7                                                                |
| RPS6KA1     | 22                                                                           | 2.0                                          | 87.5                                                                |
| PLK1        | 22                                                                           | 1.5                                          | 84.2                                                                |
| STK10       | 21                                                                           | 2.1                                          | 87.9                                                                |
| RET         | 21                                                                           | 2.0                                          | 54.2                                                                |
| ZAP70       | 21                                                                           | 1.3                                          | 75.0                                                                |

**C** Kinases with the lowest # of variants per targeted HPR

| Kinase name | # of distinct heptameric peptide regions phosphorylated by the listed kinase | mean # of variants per HPR target per kinase | mean % non-synonymous variants per HPR target per kinase (% nsHPRv) |
|-------------|------------------------------------------------------------------------------|----------------------------------------------|---------------------------------------------------------------------|
|             | (x-axis)                                                                     | (y-axis)                                     | (color-code)                                                        |
| MAP3K14     | 6                                                                            | 0.0                                          | 0.0                                                                 |
| PRKACG      | 4                                                                            | 0.0                                          | 0.0                                                                 |
| EEF2K       | 3                                                                            | 0.0                                          | 0.0                                                                 |
| MNAT1       | 3                                                                            | 0.0                                          | 0.0                                                                 |
| IGF1R       | 2                                                                            | 0.0                                          | 0.0                                                                 |
| MAPK15      | 2                                                                            | 0.0                                          | 0.0                                                                 |
| NLK         | 2                                                                            | 0.0                                          | 0.0                                                                 |
| PKMYT1      | 2                                                                            | 0.0                                          | 0.0                                                                 |
| TESK1       | 2                                                                            | 0.0                                          | 0.0                                                                 |
| TESK2       | 2                                                                            | 0.0                                          | 0.0                                                                 |
| ACVR1       | 1                                                                            | 0.0                                          | 0.0                                                                 |
| BRD4        | 1                                                                            | 0.0                                          | 0.0                                                                 |
| CAD         | 1                                                                            | 0.0                                          | 0.0                                                                 |
| CCNA2       | 1                                                                            | 0.0                                          | 0.0                                                                 |
| CDK16       | 1                                                                            | 0.0                                          | 0.0                                                                 |
| CDK19       | 1                                                                            | 0.0                                          | 0.0                                                                 |
| CDK20       | 1                                                                            | 0.0                                          | 0.0                                                                 |
| CLK4        | 1                                                                            | 0.0                                          | 0.0                                                                 |
| CRK         | 1                                                                            | 0.0                                          | 0.0                                                                 |
| DAPK2       | 1                                                                            | 0.0                                          | 0.0                                                                 |
| DDR1        | 1                                                                            | 0.0                                          | 0.0                                                                 |
| EIF2AK1     | 1                                                                            | 0.0                                          | 0.0                                                                 |
| EIF2AK3     | 1                                                                            | 0.0                                          | 0.0                                                                 |
| LIMK2       | 1                                                                            | 0.0                                          | 0.0                                                                 |
| MAP3K10     | 1                                                                            | 0.0                                          | 0.0                                                                 |
| MAP3K11     | 1                                                                            | 0.0                                          | 0.0                                                                 |
| MAP3K3      | 1                                                                            | 0.0                                          | 0.0                                                                 |
| MAP3K9      | 1                                                                            | 0.0                                          | 0.0                                                                 |
| MAPK4       | 1                                                                            | 0.0                                          | 0.0                                                                 |
| MAPK6       | 1                                                                            | 0.0                                          | 0.0                                                                 |
| MELK        | 1                                                                            | 0.0                                          | 0.0                                                                 |
| MYT1        | 1                                                                            | 0.0                                          | 0.0                                                                 |
| NRK         | 1                                                                            | 0.0                                          | 0.0                                                                 |
| PEG3        | 1                                                                            | 0.0                                          | 0.0                                                                 |
| PINK1       | 1                                                                            | 0.0                                          | 0.0                                                                 |
| PRKAR2A     | 1                                                                            | 0.0                                          | 0.0                                                                 |
| PRKD3       | 1                                                                            | 0.0                                          | 0.0                                                                 |
| PRKRII      | 1                                                                            | 0.0                                          | 0.0                                                                 |
| TRPM7       | 1                                                                            | 0.0                                          | 0.0                                                                 |
| UHMK1       | 1                                                                            | 0.0                                          | 0.0                                                                 |
| WEE2        | 1                                                                            | 0.0                                          | 0.0                                                                 |

Protein labels and size reflect the number of reaction partners (i.e. 1st degree neighbors, including both kinases (upstream/inbound) and substrates (downstream/outbound)); from >10 (mini) to 123 (maxi) connections, rendered as 75 to 300 fonts).

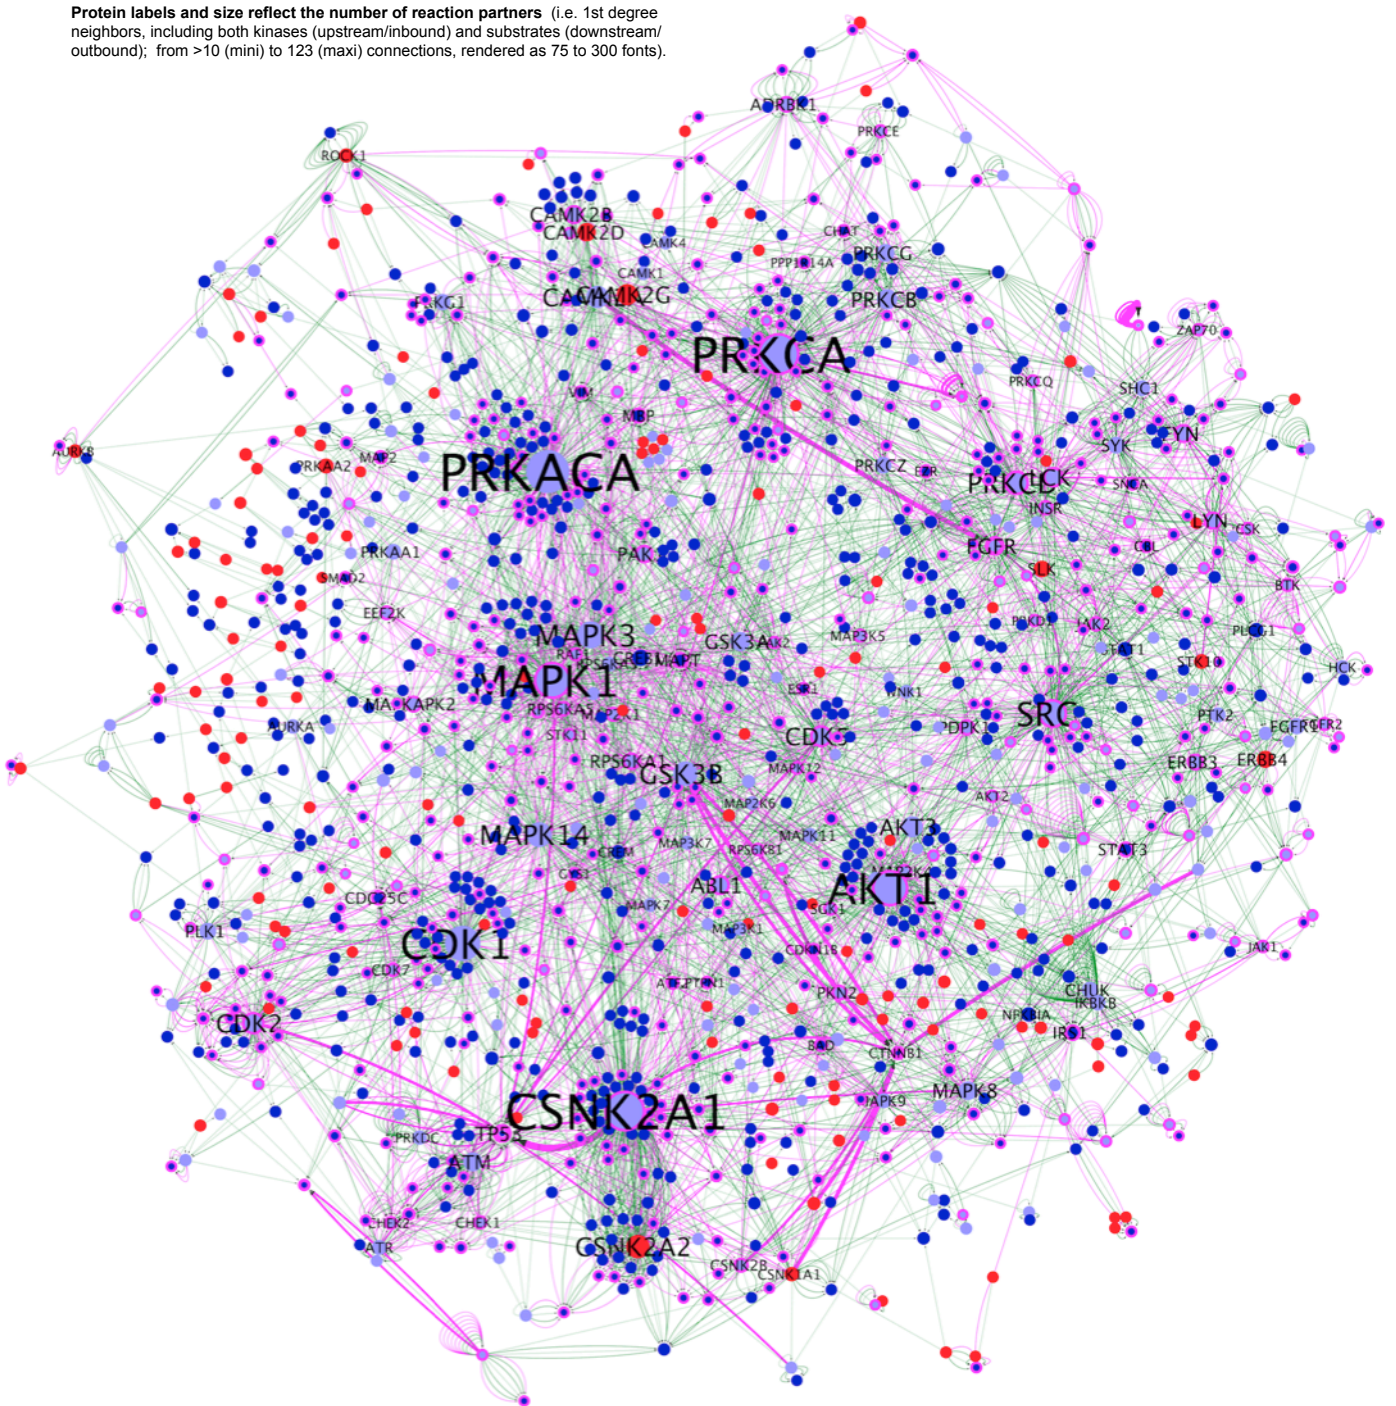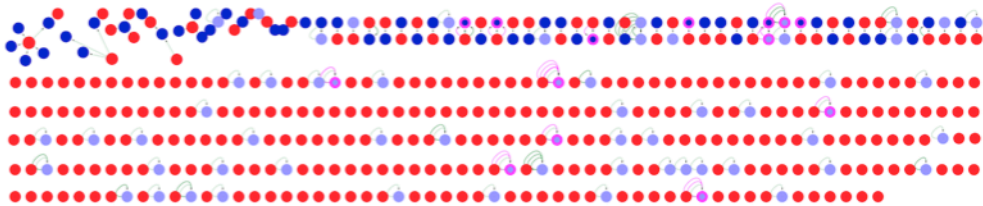

419 proteins not interconnected to the main network  
(158 edges)

- Protein that functions as a kinase only; the diameter increases proportionally with the number of substrates it phosphorylates.
- Protein that functions both as a kinase and a substrate; the diameter increases proportionally to the sum of all of kinases phosphorylating it and all substrates it phosphorylates.
- Protein that functions as a substrate only; the diameter increases proportionally with the number of kinases phosphorylating it
- phosphorylation with unknown target site
- individual phosphorylation on a known target site (with no known non-synonymous mutation within the immediate target site range); residue target sites are annotated in the middle of each connector
- individual phosphorylation on a known target site with one or more known non-synonymous mutation(s) within the immediate target site range; the line width increases with the number of mutations
- margin increases proportionally with the number of known non-synonymous mutations within the immediate range of any target site

Protein labels reflects the number of variants (i.e. non-synonymous variants affecting their endogenous target sites; from >5 (mini) to 183 (maxi) n.s.v. mutations, rendered as 125 to 350 fonts). Protein size is similar in previous figure: it reflects the number of reaction partners (i.e. 1st degree neighbors, including both kinases (upstream/inbound) and substrates (downstream/outbound)).

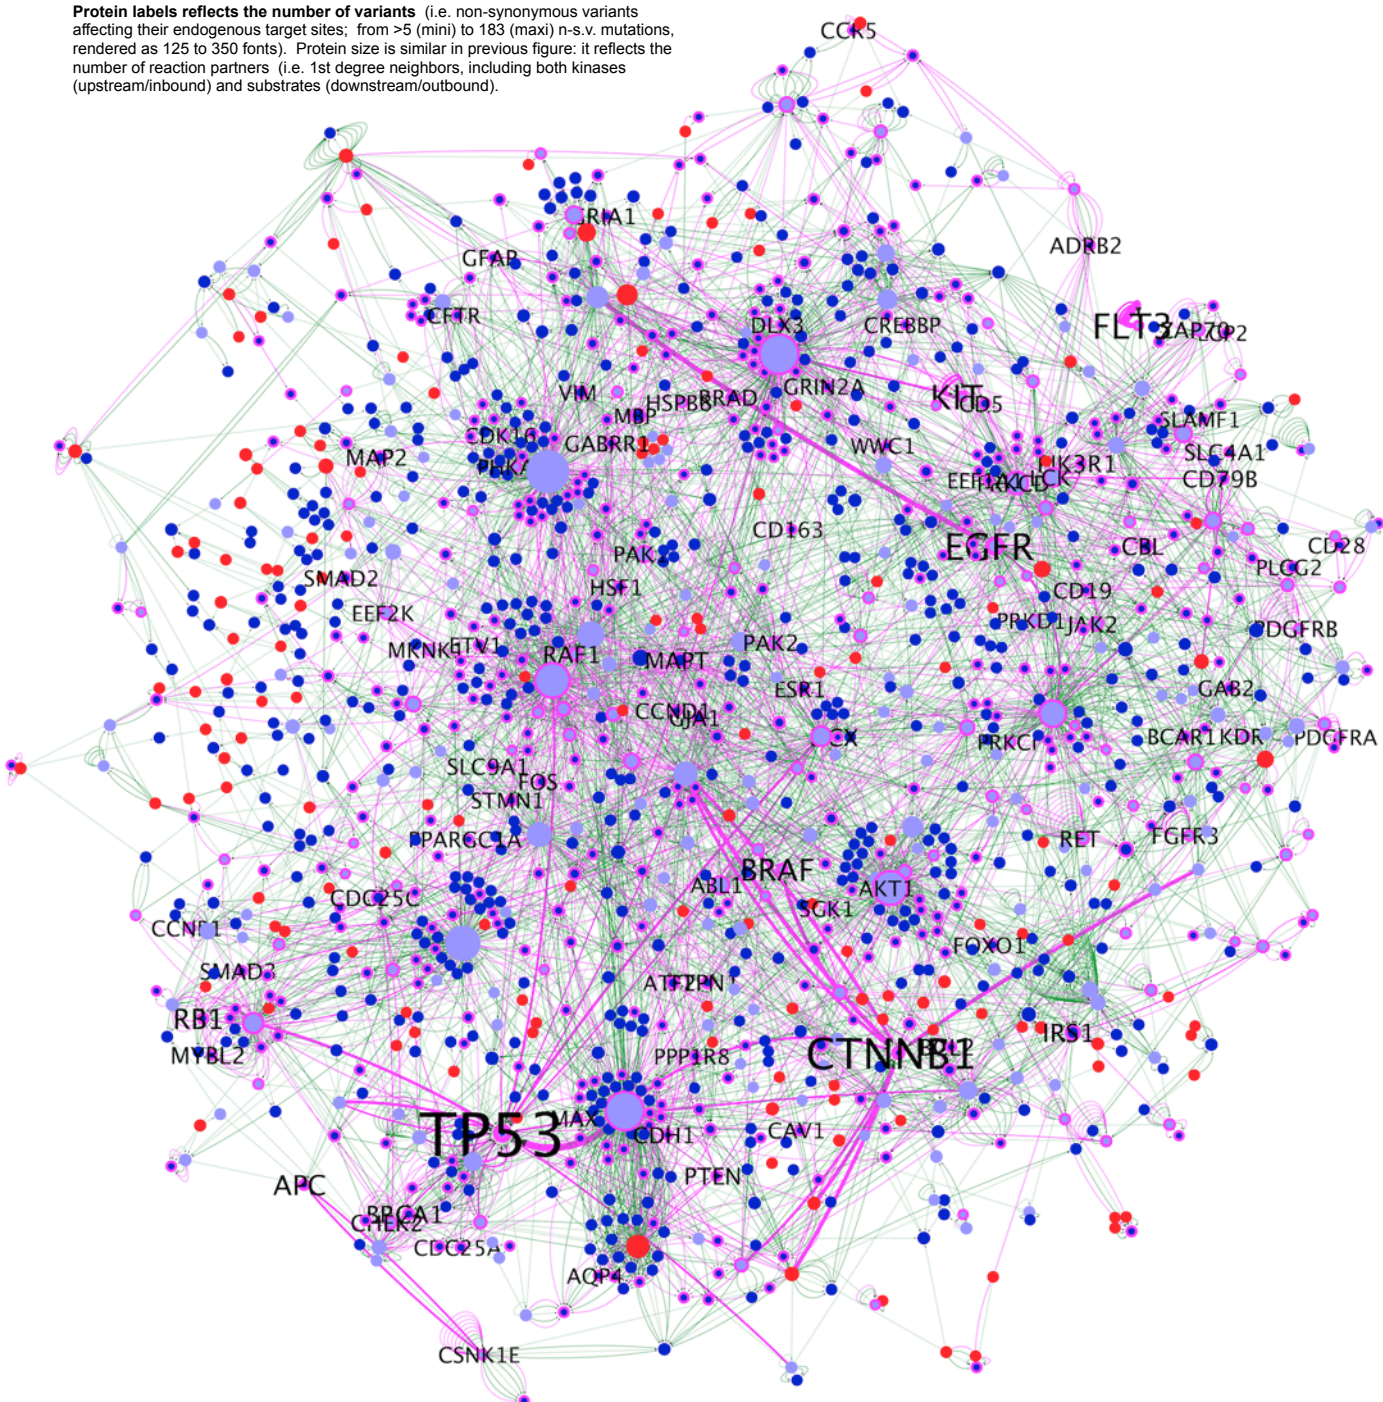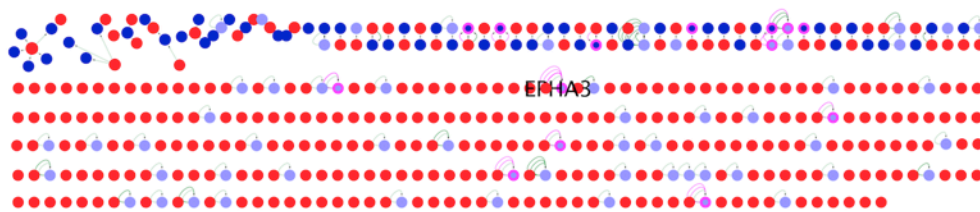

- Protein that functions as a kinase only; the diameter increases proportionally with the number of substrates it phosphorylates.
- Protein that functions both as a kinase and a substrate; the diameter increases proportionally to the sum of all of kinases phosphorylating it and all substrates it phosphorylates.
- Protein that functions as a substrate only; the diameter increases proportionally with the number of kinases phosphorylating it
- phosphorylation with unknown target site
- individual phosphorylation on a known target site (with no known non-synonymous mutation within the immediate target site range); residue target sites are annotated in the middle of each connector
- phosphorylation on a known target site with one or more known non-synonymous mutation(s) within the immediate target site range; the line width increases with the number of mutations
- margin increases proportionally with the number of known non-synonymous mutations within the immediate range of any target site

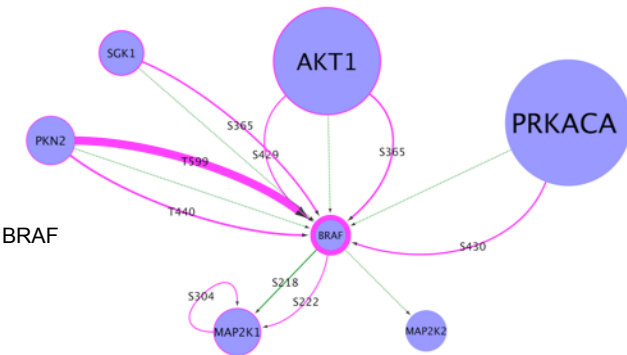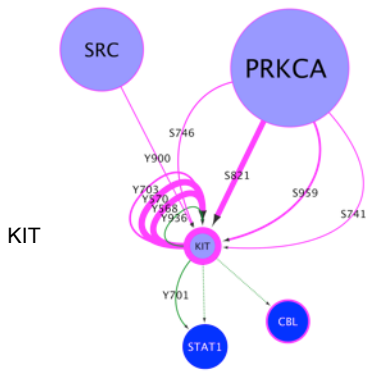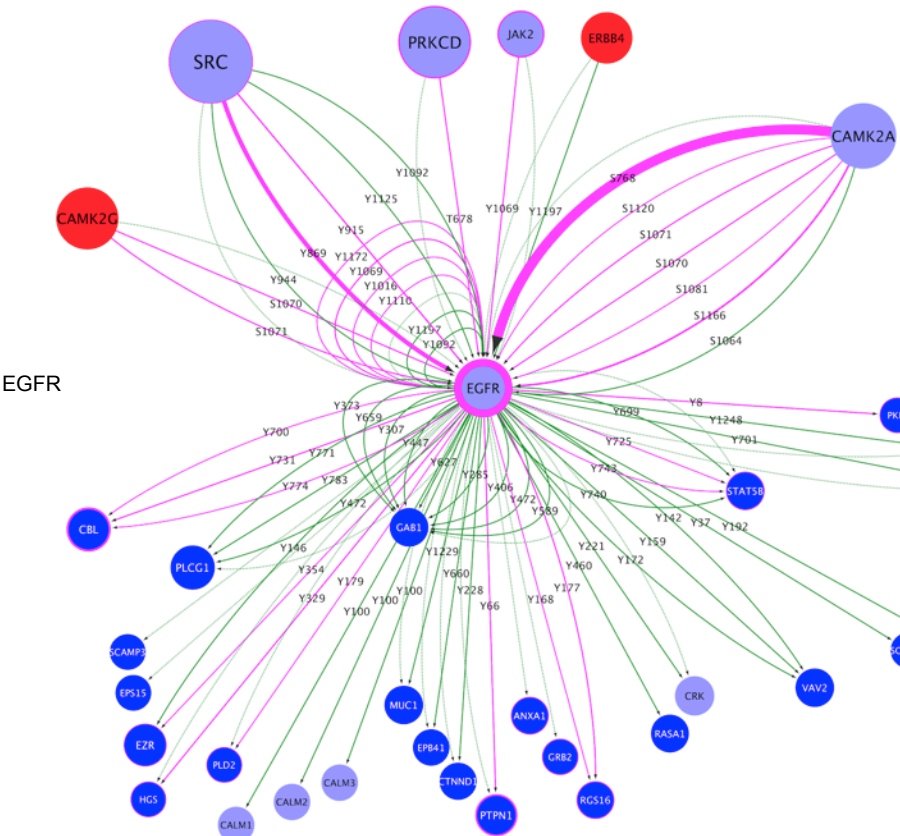

- Protein that functions as a kinase only; the diameter increases proportionally with the number of substrates it phosphorylates.
- Protein that functions both as a kinase and a substrate; the diameter increases proportionally to the sum of all of kinases phosphorylating it and all substrates it phosphorylates.
- Protein that functions as a substrate only; the diameter increases proportionally with the number of kinases phosphorylating it
- phosphorylation with unknown target site
- individual phosphorylation on a known target site (with no known non-synonymous mutation within the immediate target site range); residue target sites are annotated in the middle of each connector
- individual phosphorylation on a known target site with one or more known non-synonymous mutation(s) within the immediate target site range; the line width increases with the number of mutations
- margin increases proportionally with the number of known non-synonymous mutations within the immediate range of any target site

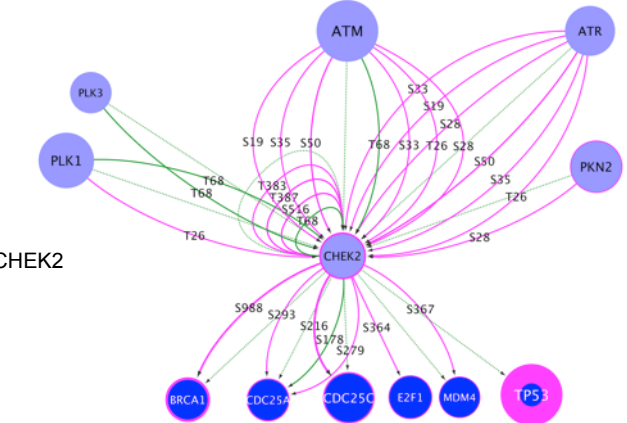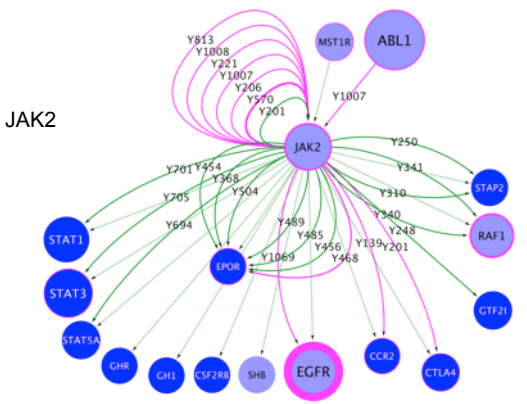

**Supplement Figure S15**



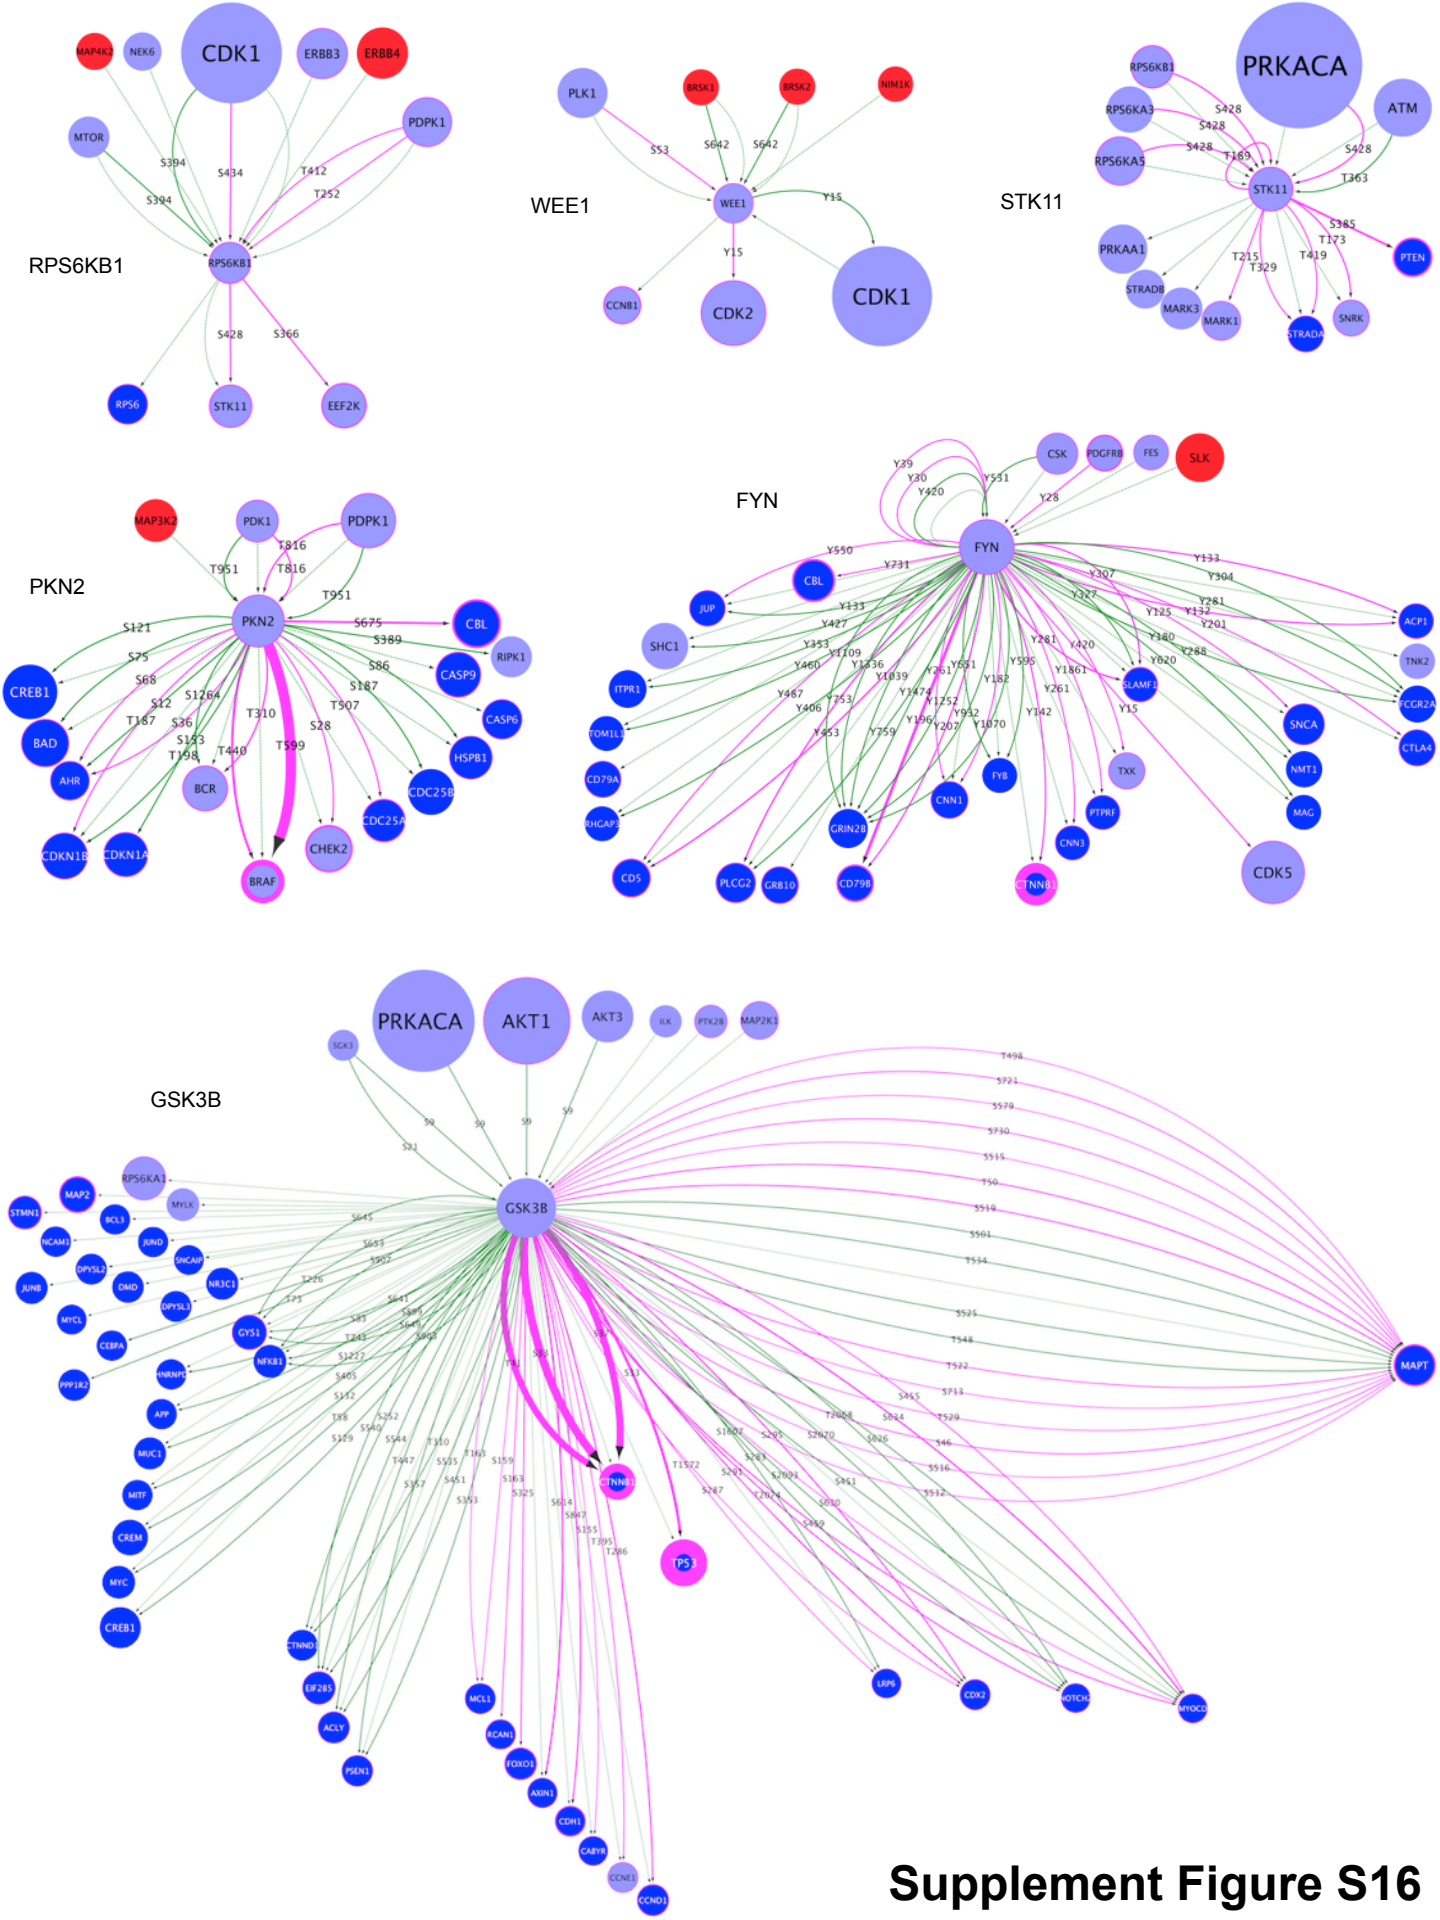

Supplement: NIHMS757540-supplement-1.pdf [file NIHMS757540-supplement-1.pdf]
